# Supplementary material
Source: MDPI journal article supplement (https://www.mdpi.com/2673-4095/2/1/4)
Supplement: s1 [file s1]

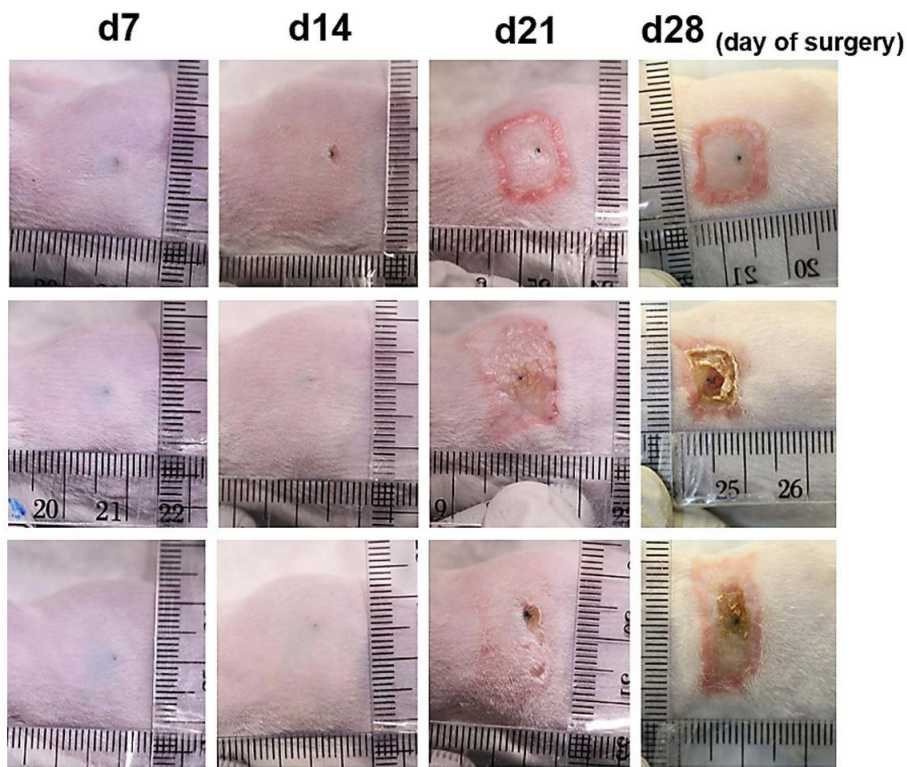

**Figure S1.** Masson's trichrome staining showing the histological appearance of irradiated murine skin before wounding by incision.

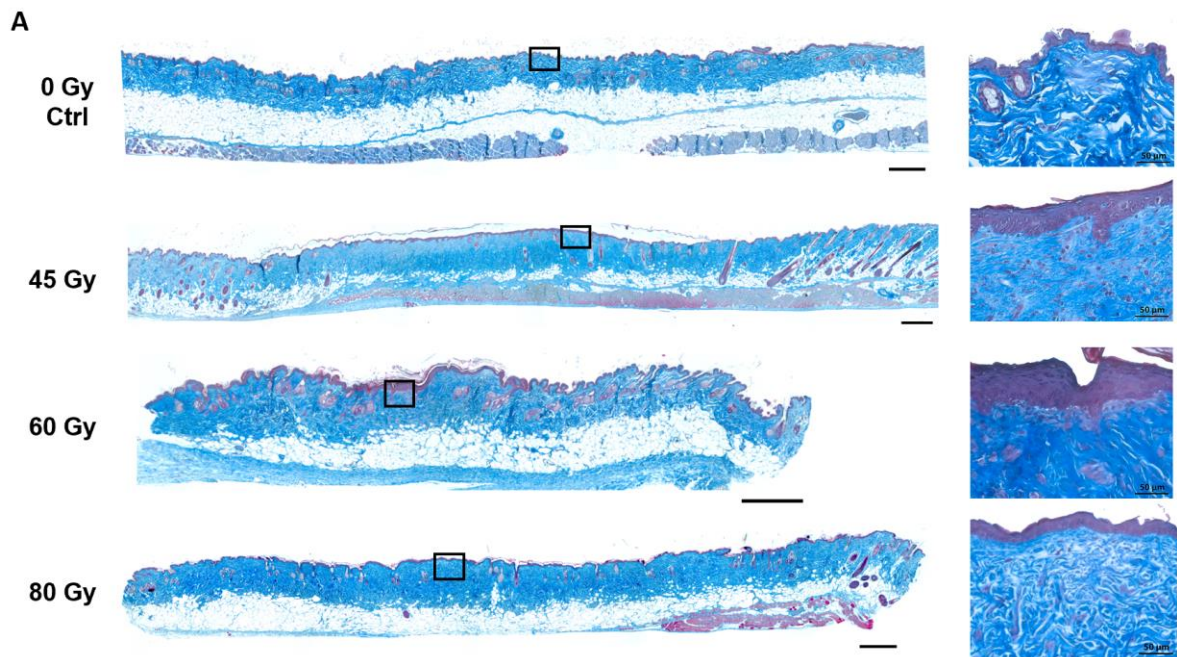

**Figure S2.** Masson's trichrome staining showing the histological appearance of irradiated murine skin before wounding by incision, namely at day 56 for the 45 Gy dose, at day 155 for the 60 Gy dose, and at day 91 for the 80 Gy dose.
